# Supplementary material for: SpxA1 and SpxA2 Act Coordinately To Fine-Tune Stress Responses and Virulence in Streptococcus pyogenes
Source: mBio. 2017 Mar 28;8(2):e00288-17. doi: 10.1128/mBio.00288-17 (PMC5371413; doi:10.1128/mBio.00288-17)
Supplement: FIG S2 [file mbo002173246sf2.pdf]

| ORF          | Locus      | (Prefix)    |                                                                                                                                             |
|--------------|------------|-------------|---------------------------------------------------------------------------------------------------------------------------------------------|
| <b>SpxA1</b> |            |             | *: *: *****:*** *: : *:***: . : : ** **:***:***** :*** :::: : . * : : . * *****: * *::*:***** ** * * : : .:                                 |
| SpxA1        | L897_04745 | (spyh)      | MVTLFLSPSCTSCRKARAWLVKHEVDFQEHNIITSPLSRDELSILSFTENGTEDEIISTRSKVFQKLDVDVEELSISDLIDLIAKNPSLLRRPIIMDQKRMQIGFNEDEIRAFLSRDYRKQELRQATIKAEIEG---   |
| SpxA1        | SPy_1249   | (spy)       | MVTLFLSPSCTSCRKARAWLVKHEVDFQEHNIITSPLSRDELSILSFTENGTEDEIISTRSKVFQKLDIDVEELSISDLIDLIAKNPSLLRRPIIMDQKRMQIGFNEDEIRAFLSRDYRKQELRQATIKAEIEG---   |
| SpxA         | SMU_1142c  | (smu)       | MVTLFLSPSCTSCRKARAWLNRHDVVFQEHNIIMTSPLSRDELLKILSYTENGTEDEIISTRSKVFQKLDIDVEELSVSELINLISKNPSSLLRRPIIMDNKRMQIGFNEDEIRAFLPDYRKQELRQATIRAEVEGEDD |
| SpxA1        | SP_1405    | (spn)       | MITLFLSPSCTSCRKAKAWLEKHKVPFVEHNIMTSPLTRKELQHILSLTENGTEDEIISTRSKIFQKLNIDVESISVSELLHLIEQYPSLLRRPIIIDAKRMQIGFNEDEIRAFLPDSYRKQELKEARMRAGIS----  |
| SpxA1        | SSA_0937   | (ssa)       | MITLFLSPSCTSCRKARAWLLNHEVPFQEHNIIMTSPLSAPELQHILSLTENGTEDEIISTRSKIFQKLDLDVEDLSISTLIQLIEENPSLLRRPIILDGKRMQIGFNEDEIRAFLPDSYRKEELRSATMRADIQ---- |
| SpxB         | L132585    | (lla)       | MIDLYLSPSCTSCRKARAWLQSHKVPFVEHNILTQPMTTNDRHILTKTENGTEDEIISTRSKVFQKLAVDVDNLTNELLDLVTEFPNLLRRPIITDSKHLQIGFNEDEIRAFLPREYRAEMLSTID-----         |
| SpxA         | EF2678     | (efa)       | MLTLYTSPSCTSCRKARAWLQEHEIPFKERNIFSEPLNIEELKAILIMTEDETEEIIISTRSKVFQKLNMDLDELPLQDLLELVQENPGLLRPIMIDEKRLQVGFNEDEIRRFLPRDVRQLELRQAQLMAGL-----   |
| SpxA         | SA0856     | (sau)       | MVTLTSPSCTSCRKAKAWLQEHDIPTYERNIFSEHLTIDEIKQILKMTEDGTEDEIISTRSKTYQKLNVDIDSLPLQDLYSIIQDNPGLLRRPIILDNKRLQVGYNEDEIRRFLPRKVRTFQLQEAQRMVD-----    |
| SpxA         | BSU11500   | (bsu)       | MVTLYTSPSCTSCRKARAWLEEHEIPFVERNIFSEPLSIDEIKQILRMTEDETEDEIISTRSKVFQKLNVNVESMPLQDLYRLINEHPGLLRPIIIDEKRLQVGYNEDEIRRFLPRKVRSFQLREAQRLAN-----    |
| SpxA         | lmo2191    | (lmo)       | MVTLYTSPSCTSCRKARAWLEEHDIPYKERNIFSEPLSLDEIKEILRMTEDETEDEIISTRSKTFQKLNVDLDSLPLQQLFELIQKNPGLLRPIIIDEKRLQVGYNEDEIRRFLPRRVRTYQLREAQKMVN-----    |
| <b>SpxA2</b> |            |             | **.* ** *****. *: :*:*** : : : * : ** * :*: :.:***:.* * ::::*.:.:.*: :.**: ***:***:***:*****:.* :** *****:*                                 |
| SpxA2        | L897_08945 | (spyh)      | MIKIYTISSCTSCKKAKTWNLAHKLAYKEQNLGKEPLTKEEILAILSKTENGVESIVSSKNRYAKALDCDIEELSVSEVIDLIQDNPRILKSPILIDDKRLQVGYKEDDIRAFLPDSIRNIENTEARLRAAL-----   |
| SpxA2        | SPy_2115   | (spy)       | MIKIYTISSCTSCKKAKTWNLAHKLAYKEQNLGKEPLTKEEILAILSKTENGVESIVSSKNRYAKALDCDIEELSVSEVIDLIQDNPRILKSPILIDDKRLQVGYKEDDIRAFLPDSIRNIENTEARLRAAL-----   |
| SpxB         | SMU_2084c  | (smu)       | MIKIYTISSCTSCKKAKTWNLAHQLPYKEQNLAKDPLSKEEILNLSKTENGIESIVSSKNRYAKALHCNIDDLVNEVIDLIQENPRILKSPILIDDKRLQIGYKEDDIRAFLPDSIRNVENTAARLRAAL-----     |
| SpxA2        | SP_0189    | (spn)       | MIKIYTVSSCTSCKKAKTWNLAHQLSYKEQNLGKEGITREELLDILTKTDNGIASIVSSKNRYAKALGVDIEDLSVNEVLNIMETPRILKSPILVDEKRLQVGYKEDDIRAFLPDSVRNVENAEARLRAAL-----    |
| SpxA2        | SSA2244    | (ssa)       | MITIYTVSSCTSCKKAKTWNLAHQLYTYKEQNLGKEGITKEELLDILTKTENGIASIVSSKNRYAKGLGVDIEELSVNEVLNIMETPRILKSPILVDDKRLQVGYKEDDIRAFLPDSVRNVENAEARLRAAL-----   |
| TrmA         | L73853     | (lla)       | MITIYTAPSCTSCKKAKTWLSYHHIPFNERNLIADPLSTTEISQILQKDDGVEGLISSRNRVKTLGVDIEDLSQAIAKIISENPQIMRRPIIMDEKRLHVGYNEEIRAFLPRTVVRVLENGGARLSAI-----       |
|              |            |             | *: :*: *****:*** *: : *:***: . : . : ** :*: :.:***:.* * ::::*.:.:.*: :.**: ***:***:***:*****:.* ** * * : : :                                |
|              |            | <b>CxxC</b> | <b>G</b>                                                                                                                                    |

Figure S2
