# Supplementary material for: SpxA1 and SpxA2 Act Coordinately To Fine-Tune Stress Responses and Virulence in Streptococcus pyogenes
Source: PubMed Central journal article supplement (PMC5371413; doi:10.1128/mbio.00288-17), 2017-03-28
Supplement: mbo002173246sf3.pdf [file mbo002173246sf3.pdf]

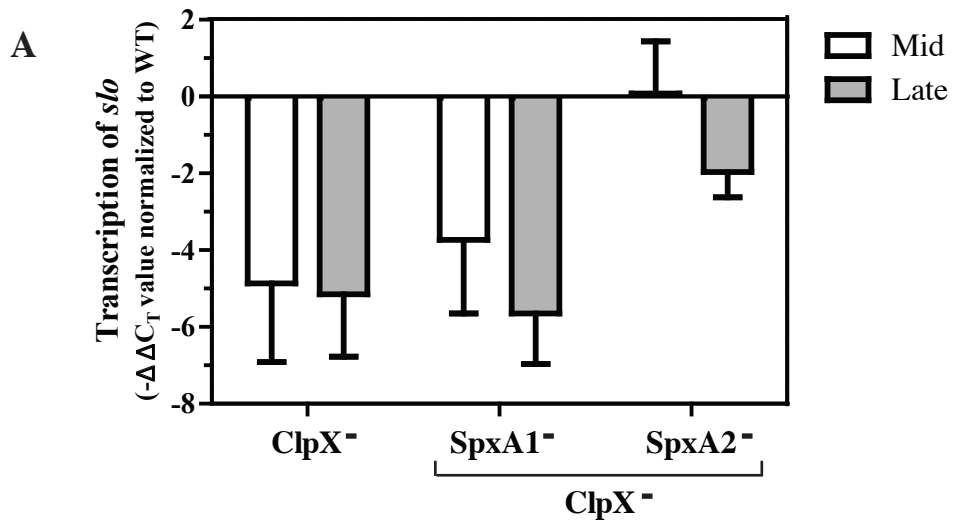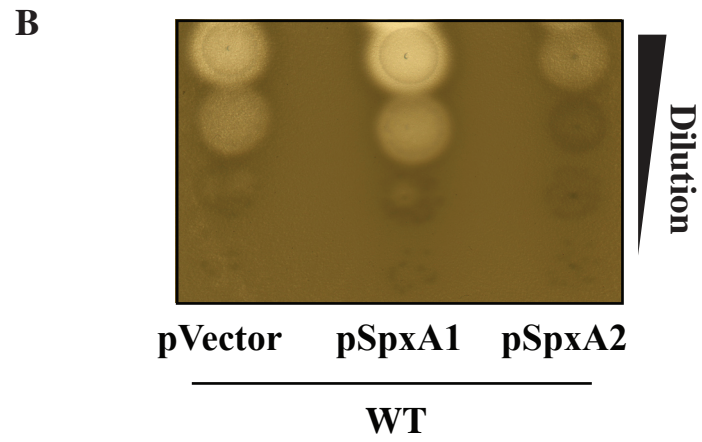

**Figure S3**
