# Supplementary material for: SpxA1 and SpxA2 Act Coordinately To Fine-Tune Stress Responses and Virulence in Streptococcus pyogenes
Source: PubMed Central journal article supplement (PMC5371413; doi:10.1128/mbio.00288-17), 2017-03-28
Supplement: mbo002173246st4.pdf [file mbo002173246st4.pdf]

**Table S4. Growth rates and yields for various *S. pyogenes* mutants.**

| Strains (alternate name) | Relevant Genotype                                         | Growth Rate <sup>a</sup> (% yield) <sup>b</sup> |            |
|--------------------------|-----------------------------------------------------------|-------------------------------------------------|------------|
|                          |                                                           | ThyB                                            | C Medium   |
| HSC5                     | wild type (WT)                                            | 43.8 (100)                                      | 50.5 (100) |
| GCP688                   | ClpX <sup>-</sup>                                         | 52.9 (93)                                       | 67.9 (104) |
| GCP1245 (ZC611)          | SpxA1 <sup>-</sup>                                        | 42.0 (83)                                       | 54.2 (102) |
| GCP1033                  | SpxA2 <sup>-</sup>                                        | 41.4 (81)                                       | 50.2 (101) |
| GCP711                   | ClpX <sup>-</sup> /SpxA1 <sup>-</sup>                     | 58.0 (86)                                       | 72.0 (105) |
| GCP726                   | ClpX <sup>-</sup> /SpxA2 <sup>-</sup>                     | 41.1 (83)                                       | 50.1 (105) |
| GCP729                   | ClpX <sup>-</sup> /SpxA1 <sup>-</sup> /SpxA2 <sup>-</sup> | 85.1 (51)                                       | 97.3 (85)  |
| GCP1072                  | SpxA1 <sup>-</sup> /SpxA2 <sup>-</sup>                    | 74.5 (62)                                       | 83.0 (99)  |
| GCP652                   | ΩClpP                                                     | 60.8 (101)                                      | 94.7 (75)  |
| GCP1300                  | ClpP:: <i>aad9</i>                                        | 72.9 (103)                                      | 91.0 (88)  |

<sup>a</sup>Growth rates (doubling time in min.) are calculated from early logarithmic growth in indicated medium.

<sup>b</sup>Yields (% of WT) are calculated from overnight growth in indicated medium in comparison to WT.
