# Supplementary material for: SpxA1 and SpxA2 Act Coordinately To Fine-Tune Stress Responses and Virulence in Streptococcus pyogenes
Source: mBio. 2017 Mar 28;8(2):e00288-17. doi: 10.1128/mBio.00288-17 (PMC5371413; doi:10.1128/mBio.00288-17)
Supplement: TABLE S3 [file mbo002173246st3.pdf]

**Table S3 Mutagenesis, complementation and RT-PCR primers used in this study**

| Name (description) <sup>a</sup>                                                                                                                                                                                        | Sequence <sup>b</sup>                                                                                                                                                                              | Template | Plasmid <sup>c</sup> |
|------------------------------------------------------------------------------------------------------------------------------------------------------------------------------------------------------------------------|----------------------------------------------------------------------------------------------------------------------------------------------------------------------------------------------------|----------|----------------------|
| GP728 (ΩCIP-P-M13F-F1)<br>GP729 (ΩCIP-P-M13R-R1)                                                                                                                                                                       | tgtaaaacgacggccagt-GACCGTATTATCATGTAAACAGG<br>cacacaggaacagctatgac-ATTGGCTGGTGGATCATATATAC                                                                                                         | HSC5     | pGCP647              |
| GP730 (ΩCIP-L-M13F-F1)<br>GP731 (ΩCIP-L-M13R-R1)                                                                                                                                                                       | tgtaaaacgacggccagt-CGAAGAATTCCAACACTATCG<br>cacacaggaacagctatgac-GGACATCTCCATTAAACAATGG                                                                                                            | HSC5     | pGCP648              |
| GP732 (ΩCIP-E-M13F-F1)<br>GP733 (ΩCIP-E-M13R-R1)                                                                                                                                                                       | tgtaaaacgacggccagt-GAGCACAGAAGATAGATCCACAAG<br>cacacaggaacagctatgac-CTCGATAACGCGTGTAATCTC                                                                                                          | HSC5     | pGCP649              |
| GP734 (ΩCIP-C-M13F-F1)<br>GP735 (ΩCIP-C-M13R-R1)                                                                                                                                                                       | tgtaaaacgacggccagt-CCATAGAAGAATATGAAGCTGC<br>cacacaggaacagctatgac-CTGCTAGACGTTCTATTTC                                                                                                              | HSC5     | pGCP650              |
| GP736 (ΩCIS-R-M13F-F1)<br>GP737 (ΩCIS-R-M13R-R1)                                                                                                                                                                       | tgtaaaacgacggccagt-GCAGAAATTAAAGCGGTCC<br>cacacaggaacagctatgac-CCTCAGCTCTGTCAATAAG                                                                                                                 | HSC5     | pGCP651              |
| GP712 (CIP-X-M13F-F1)<br>GP715 (CIP-X-M13R-R1)                                                                                                                                                                         | tgtaaaacgacggccagt-GAGGTGTTGACAATGACTAGTATTG<br>cacacaggaacagctatgac-ACCTATCCTAGACCTGCTC                                                                                                           | HSC5     | pGCP1001             |
| GP258 (5'GuaB-BamHI-F1)<br>GP206 (5'GuaB-ClaI-P-R2)<br>GP207 (3'GuaB-PstI-P-F3)<br>GP259 (3'GuaB-KpnI-R4)                                                                                                              | GCT- <u>GGATCC</u> -CTATGAAGAAAGGATCAAGCG<br><u>gCT-ATCGAT</u> -AATTAAATTATCAGTGCACAGAATAG<br><u>gCT-CTGCAG</u> -TAGTAACTTTAAGGGCTGACATATTG<br>GCT- <u>GGTACC</u> -AGTCATTCTTAGAGTTTGTTC           | HSC5     | pGCP140b             |
| GP209 (sfGFP-ClaI-F)<br>GP038 (sfGFP-PstI-R)                                                                                                                                                                           | GCT- <u>ATCGAT</u> -AAGAAGGAGATATACATATGAGCAAAG<br>CCC- <u>CTGCAG</u> -TTATTTGTAGAGCTCATCCATGC                                                                                                     | pGCP059  | pGCP189              |
| GP687 (3'GuaB-CIPX <sup>R</sup> -F)<br>GP688 (3'GuaB-CIPX <sup>R</sup> -R)                                                                                                                                             | gcactgataattttaattatcgataaagaaggagataacat-ATGGCAGGAAATAGAACTAACG<br>caatatgtgcagcccttaaagtactactgcagttta-AGCTGTCTCTAAACGCGG                                                                        | HSC5     | pGCP610              |
| CK550 (ΔSpeB-BamHI-F1)<br>CK549 (ΔSpeB-R2)<br>CK548 (ΔSpeB-F3)<br>CK547 (ΔSpeB-KpnI-R4)                                                                                                                                | CCC- <u>GGATCC</u> -GATAAATCAGCCAGGAAAAAGCC<br><u>tGCACCTGCTTTGATAGCTGCTG</u><br><u>gATGGTGCTGACGACGTAAAC</u><br>CCC- <u>GGTACC</u> -GCGTTGATGACCTCCTTTATC                                         |          | pGCP485 (pCK365)     |
| ZC374 (ΔSpxA1-SalI-F1)<br>ZC375 (ΔSpxA1-R2)<br>ZC376 (ΔSpxA1-F3)<br>ZC377 (ΔSpxA1-PstI-R4)                                                                                                                             | CCCCTCGAG- <u>GTCGAC</u> -GAAGATCATCGAAAAATTTCTGCTACATG<br>TTTC-GCTAGGTGATAAAAAATAGGTAACCATATTTTT<br>GAAATTGAGGGGTGATATGTCAGG<br>CCCCCGGG- <u>CTGCAG</u> -GATTAATGGGGTGACGAACGTC                   | HSC5     | pGCP1289 (pZC165)    |
| GP799 (ΔSpxA2-M13R-F1)<br>ZC380 (ΔSpxA2-R2)<br>ZC379 (ΔSpxA2-F3)<br>GP800 (ΔSpxA2-M13F-R4)                                                                                                                             | cacacaggaacagctatgac-GACTACTGTTCATAGGTGTGTGG<br>GCTCGTACAACTTGAAATCGTG<br>CACGATTTCAAGTTGTACGAGC-GCACGATTACGTGCTGCAC<br>tgtaaaacgacggccagt-CCCACTCAAGACATAACCAAC                                   | HSC5     | pGCP1290 (pZC192)    |
| ZC388 (pSpxA1-6xHis-EcoRI-F)<br>ZC392 (pSpxA1-6xHis-PstI-R)                                                                                                                                                            | AACT- <u>GAATTC</u> -ATGGTTACCTTATTTTATCACCTAGCTGTACC<br>TGAT- <u>CTGCAG</u> - <u>TCACTGGTGGTGGTGGTG</u> -CCCCCAATTTCTGCTTTTATCGTTGCTTGACG                                                         | HSC5     | pZC169               |
| ZC390 (pSpxA2-6xHis-EcoRI-F)<br>ZC393 (pSpxA2-6xHis-PstI-R)                                                                                                                                                            | AACT- <u>GAATTC</u> -ATGATTAAAAATTACACGATTCAAGTTG<br>TGAT- <u>CTGCAG</u> - <u>TTAGTGGTGGTGGTGGTG</u> -GAGTGCAGCAGCTAATCGTGCTTCAG                                                                   |          | pZC170               |
| GP1021 ( <i>recA</i> -F)<br>GP1022 ( <i>recA</i> -R)<br>GP1023 ( <i>speB</i> -F)<br>GP1024 ( <i>speB</i> -R)<br>JLP29 ( <i>ropB</i> -F)<br>JLP30 ( <i>ropB</i> -R)<br>CK361 ( <i>slo</i> -F)<br>CK362 ( <i>slo</i> -R) | AGTGATGCGATTAGGAGAACG<br>TCGTTTACCAGGAAGACTCTG<br>CCAAGGTGTCGGTAAAGTAGG<br>AGAGCTGAAGGGTTAGTGC<br>TGAAACGGTGTTGTGTGTCCTTT<br>TGGATCGTTTGTGCAATTGAG<br>GCTAGTACAGAAACCACAAC<br>CTAGTGGCATTCTTTGGGAG |          |                      |

<sup>a</sup>Primers are categorized as forward (F) or reverse (R) relative to the direction of transcript.

<sup>a</sup>Sequence is shown 5' to 3'. Uppercase sequence anneals to the HSC5 chromosome, uppercase *italics* sequence anneals to the *sgGFP* gene, uppercase italics sequence introduces a 6x-His tag, lowercase sequence anneals to the M13F and M13R universal primer sequences, lowercase *italics* sequence anneals to the parental plasmid. Hyphens indicate junctions between contiguous DNA regions, uppercase underline indicates restriction sites, lowercase underline indicates phosphorylated 5' ends.

<sup>c</sup>Plasmid that was constructed using the indicated primers.
